# Supplementary material for: Synthesis of α-amino-lipophosphonates as cationic lipids or co-lipids for DNA transfection in dendritic cells
Source: Royal Society of Chemistry journal article supplement (doi:10.1039/c7tb01080j), 2017-01-01

## Supporting Informations

### **Synthesis of $\alpha$ -amino-lipophosphonates as cationic lipids or co-lipids for DNA transfection in dendritic cells**

Mathieu Berchel<sup>1\*</sup>, Sohail Akhter<sup>2,3\*</sup>, Wilfried Berthe<sup>1</sup>, Cristine Gonçalves<sup>2</sup>, Marine Dubuisson<sup>2</sup>,  
Chantal Pichon<sup>2</sup>, Paul-Alain Jaffrès<sup>1</sup> and Patrick Midoux<sup>2</sup>

### **Table of content**

Supplementary information (SI)

**SI; S-1:  $^1\text{H}$ ,  $^{31}\text{P}$ , &  $^{13}\text{C}$  NMR spectra**

**SI; S-2: Evaluation of the stability of compounds 5a in acidic media**

**SI; S-3: Evaluation of the stability of compounds 5b in acidic media**

## SI; S-1: $^1\text{H}$ , $^{31}\text{P}$ , & $^{13}\text{C}$ NMR spectra of new compounds

$^1\text{H}$  NMR (400 MHz,  $\text{CD}_3\text{OD}$ ) of compound **1a**.

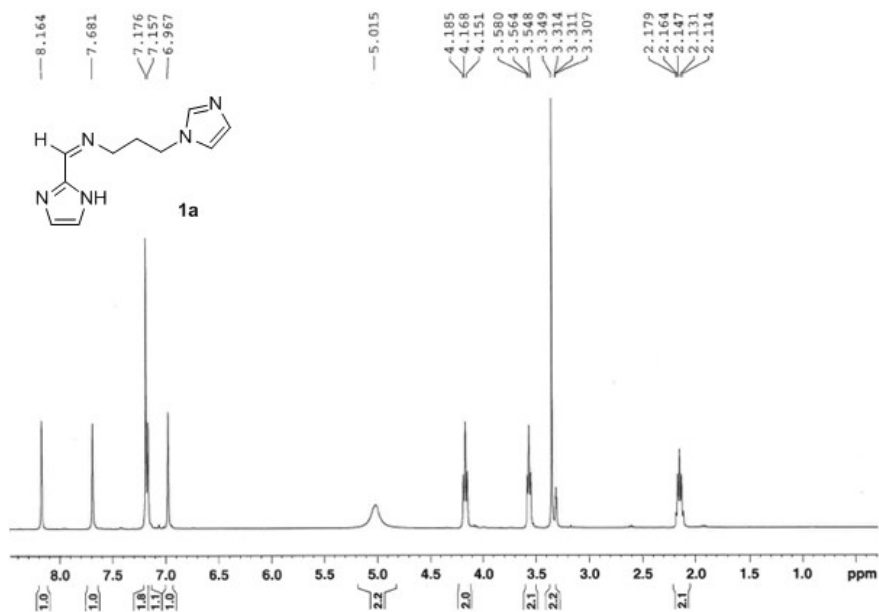

$^{13}\text{C}$  NMR (125 MHz,  $\text{CD}_3\text{OD}$ ) of compound **1a**.

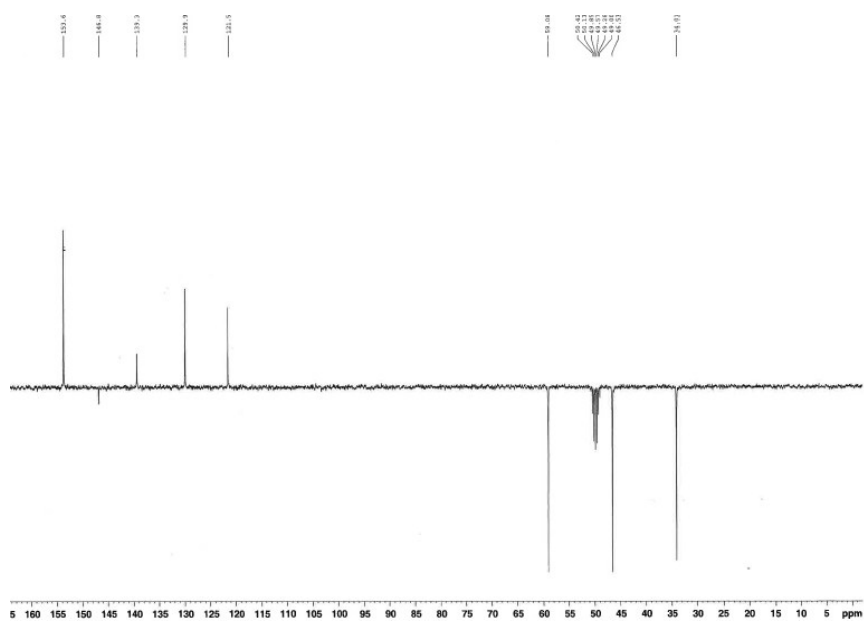

**<sup>1</sup>H NMR (400 MHz, CD<sub>3</sub>OD) of compound **1b**.**

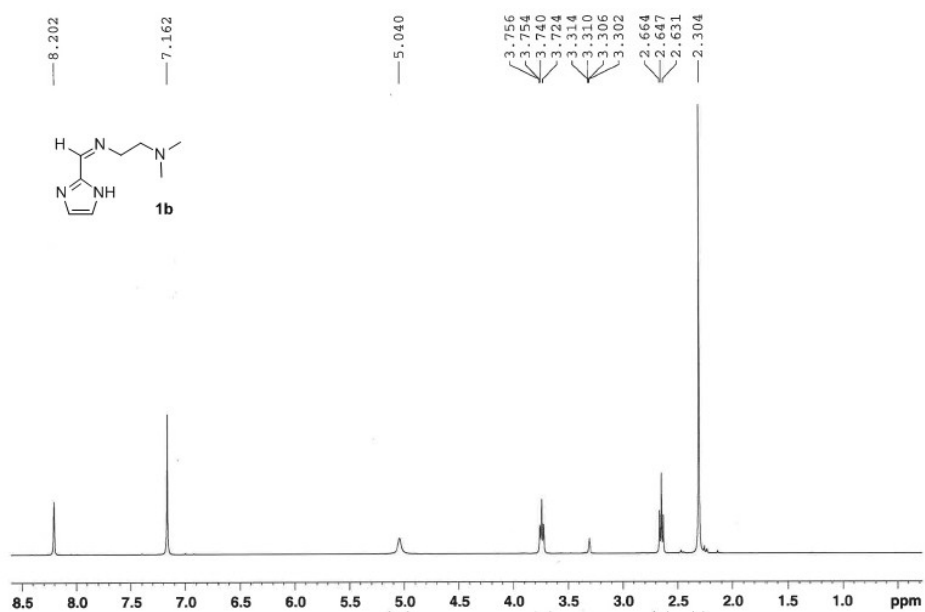

**<sup>13</sup>C NMR (125 MHz, CD<sub>3</sub>OD) of compound **1b**.**

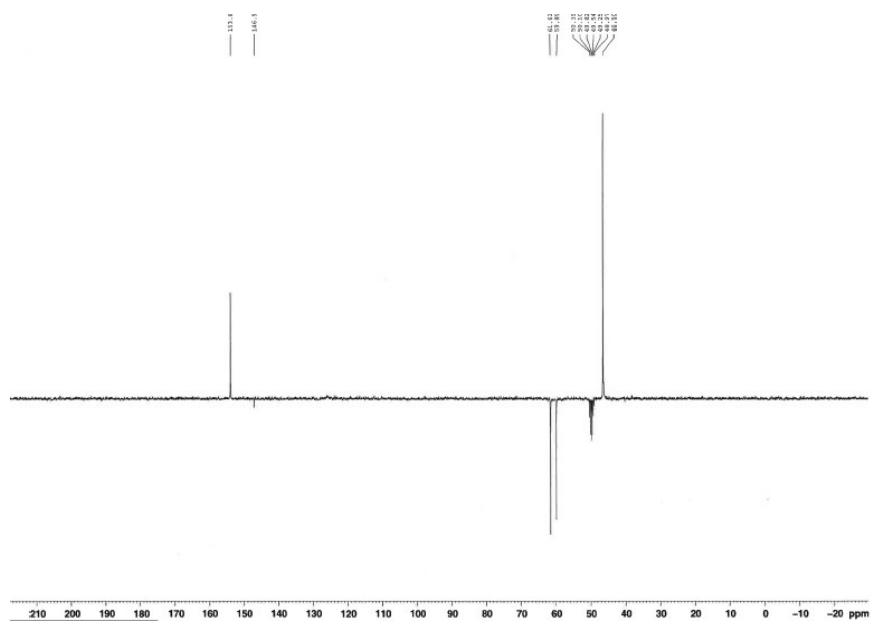

**<sup>1</sup>H NMR (400 MHz, CD<sub>3</sub>OD) of compound **1c**.**

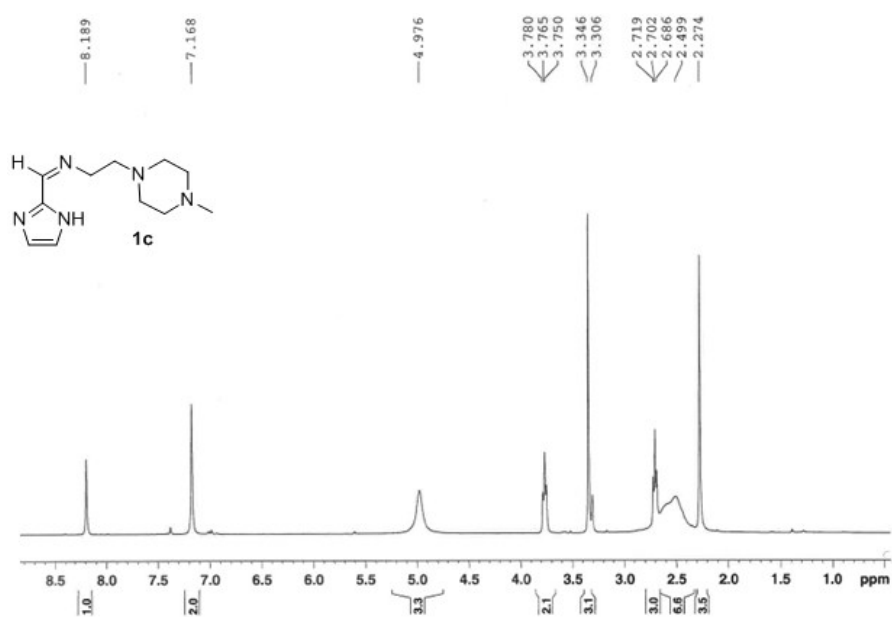

**<sup>1</sup>H NMR (400 MHz, CD<sub>3</sub>OD) of compound **1d**.**

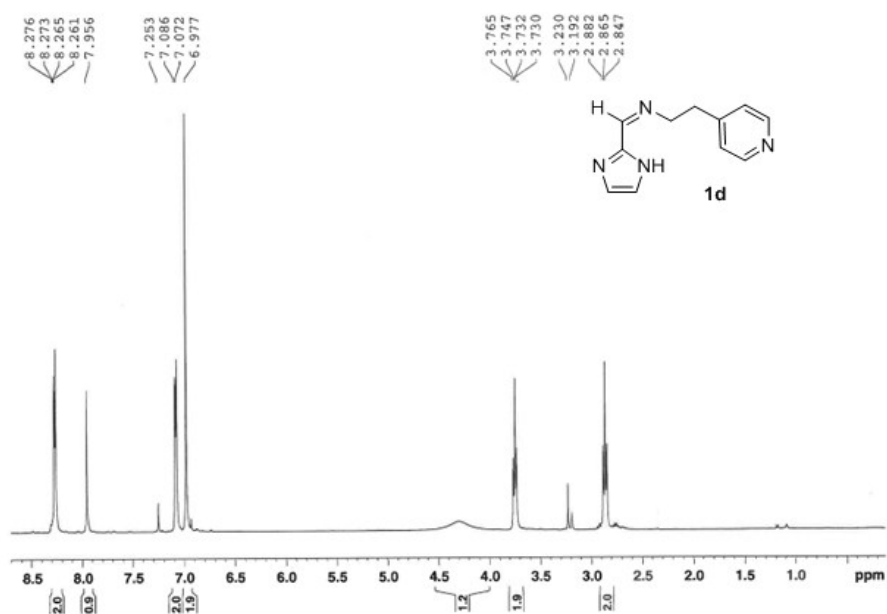

**<sup>13</sup>C NMR** (125 MHz, CD<sub>3</sub>OD) of compound **1d**.

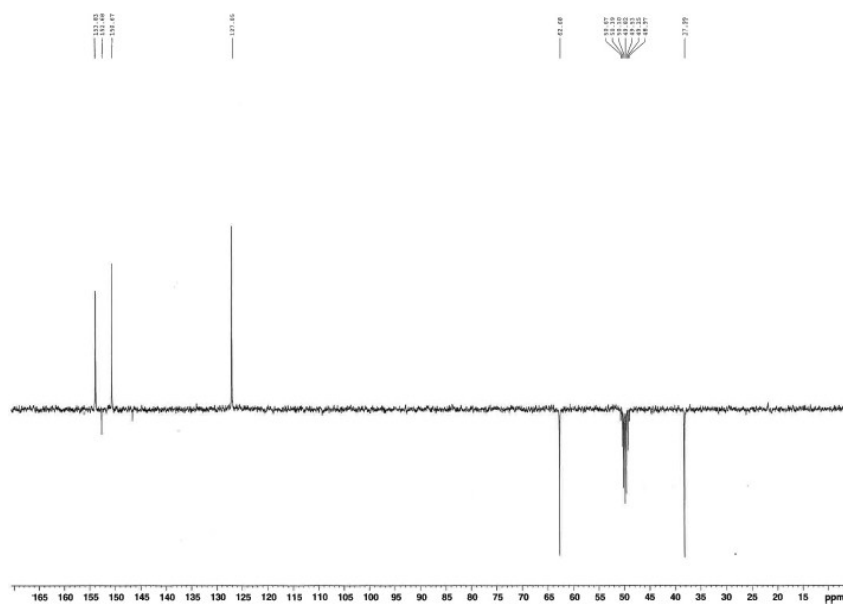

**<sup>1</sup>H NMR** (400 MHz, CD<sub>3</sub>OD) of compound **1e**.

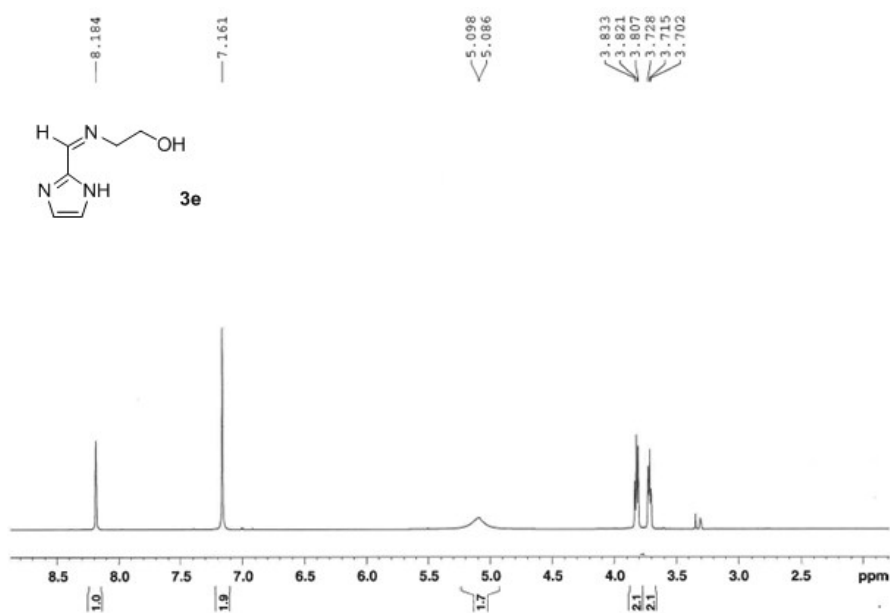

**$^{13}\text{C}$  NMR** (125 MHz,  $\text{CDCl}_3$ ) of compound **3e**.

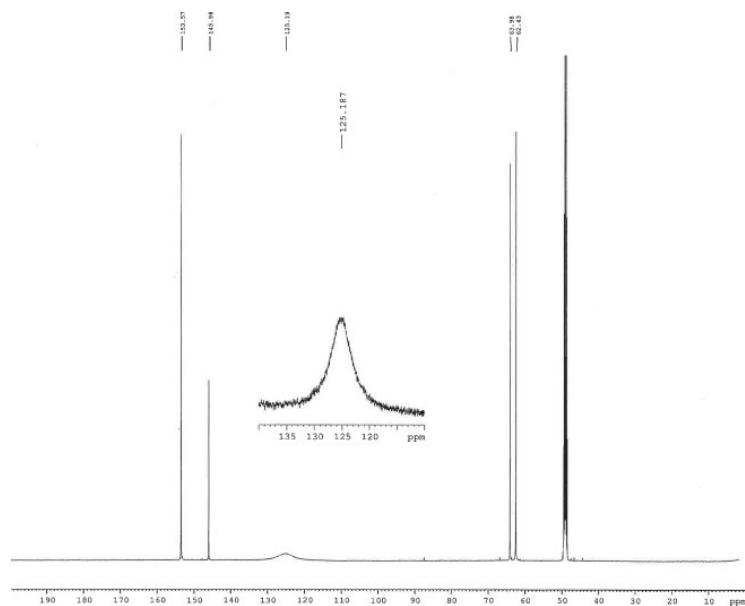

**$^1\text{H}$  NMR** (400 MHz,  $\text{CD}_3\text{OD}$ ) of compound **2a**.

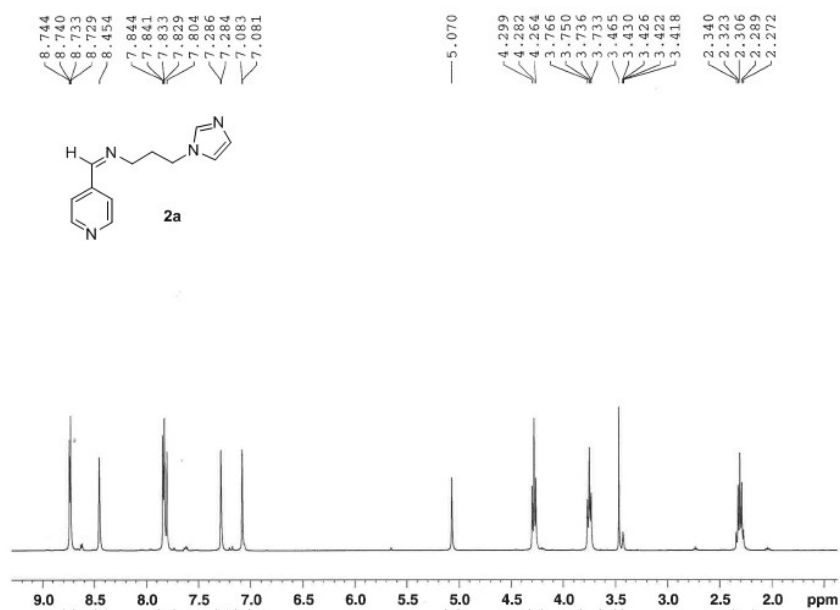

**$^{13}\text{C}$  NMR (125 MHz,  $\text{CDCl}_3$ ) of compound **2a**.**

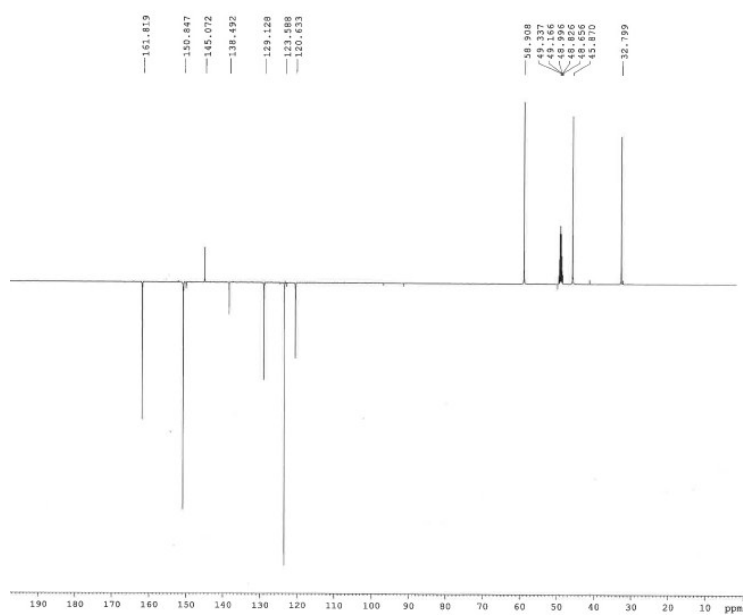

**$^1\text{H}$  NMR (400 MHz,  $\text{CD}_3\text{OD}$ ) of compound **2b**.**

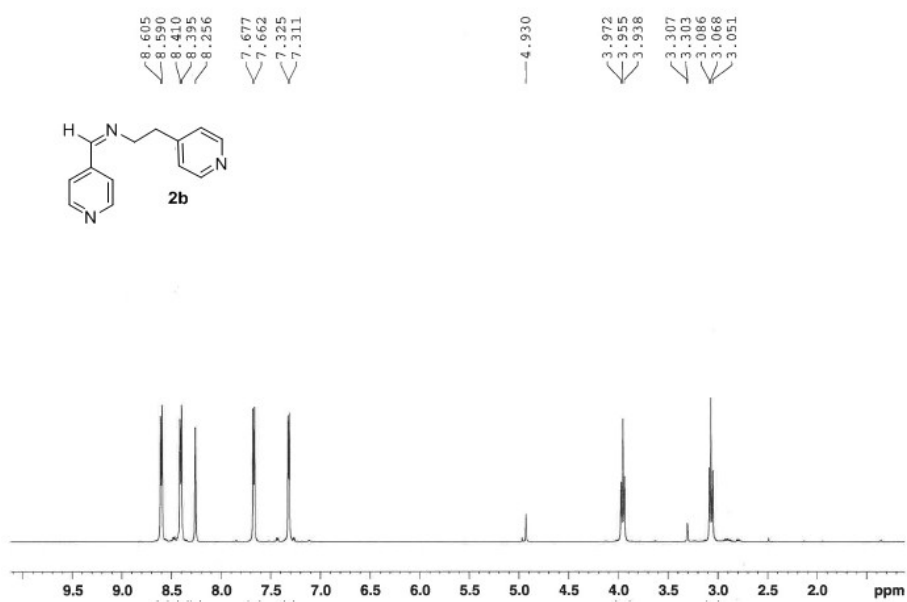

**$^{13}\text{C}$  NMR (125 MHz,  $\text{CDCl}_3$ ) of compound **2b**.**

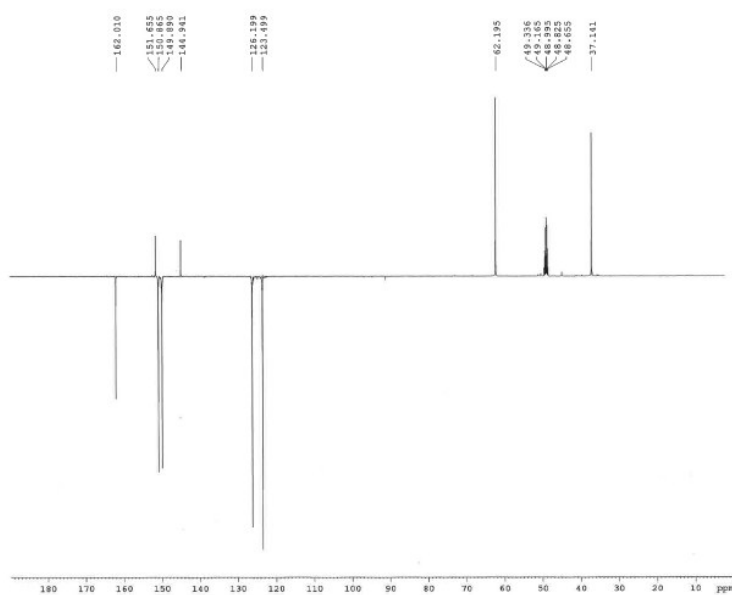

**$^1\text{H}$  NMR (400 MHz,  $\text{CDCl}_3$ ) of compound **3a**.**

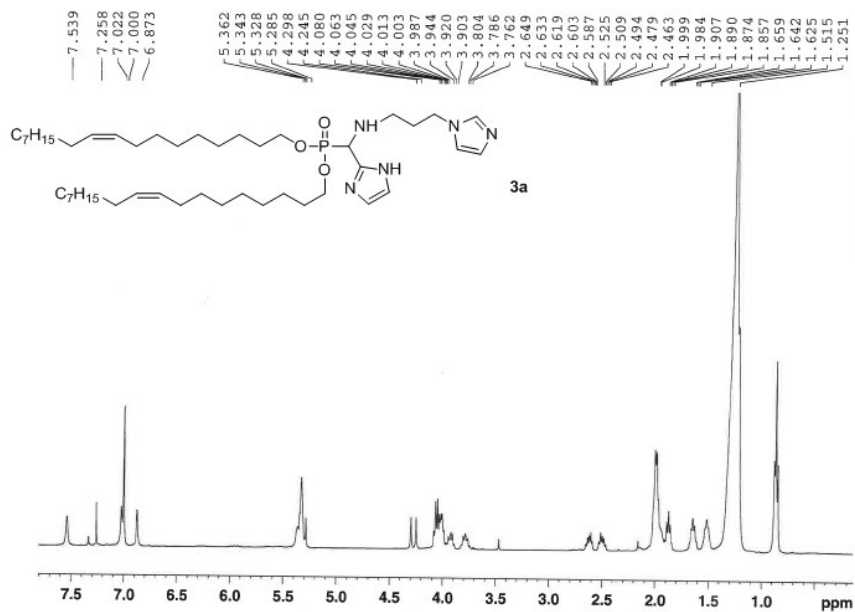



**$^{31}\text{P}$  NMR (162 MHz,  $\text{CDCl}_3$ ) of compound **3a**.**

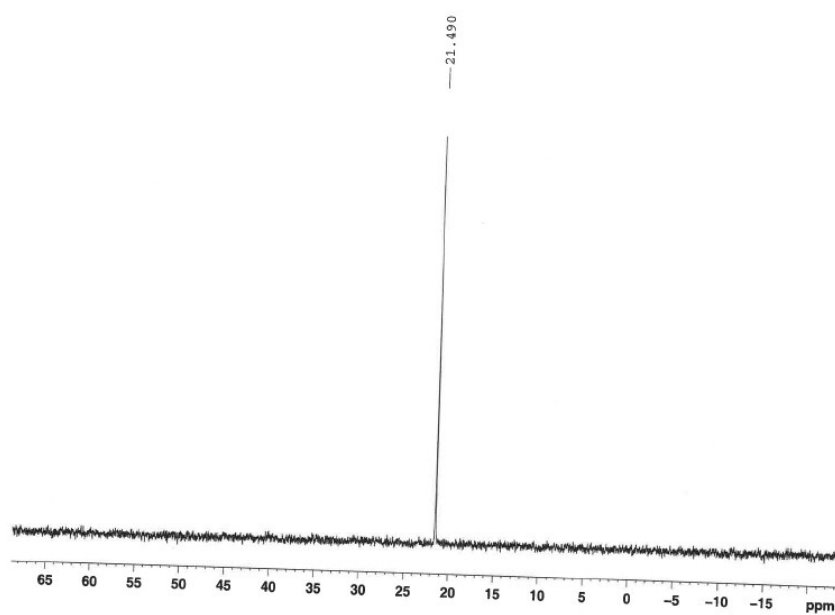

**$^{13}\text{C}$  NMR (125 MHz,  $\text{CDCl}_3$ ) of compound **3a**.**

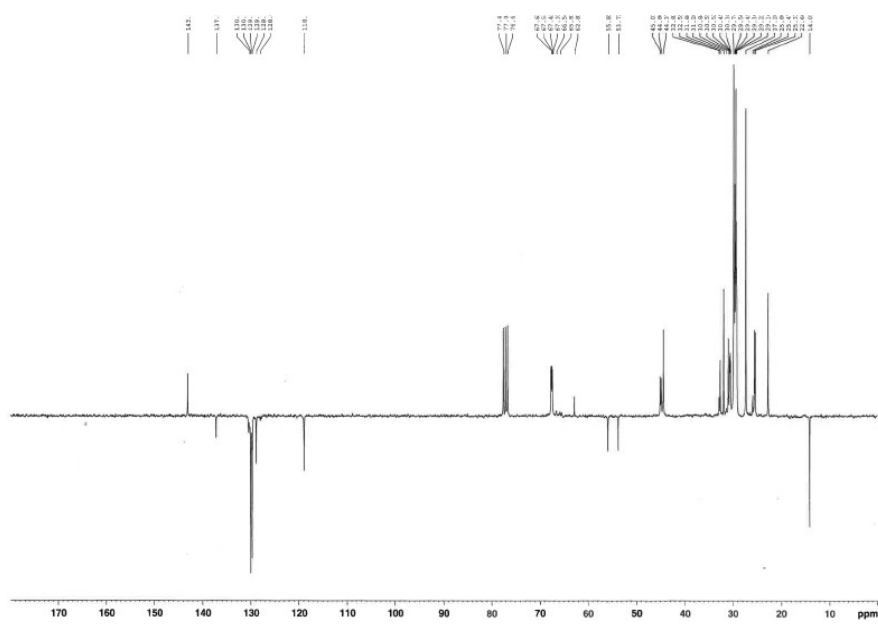

**$^1\text{H}$  NMR (400 MHz,  $\text{CDCl}_3$ ) of compound **3b**.**

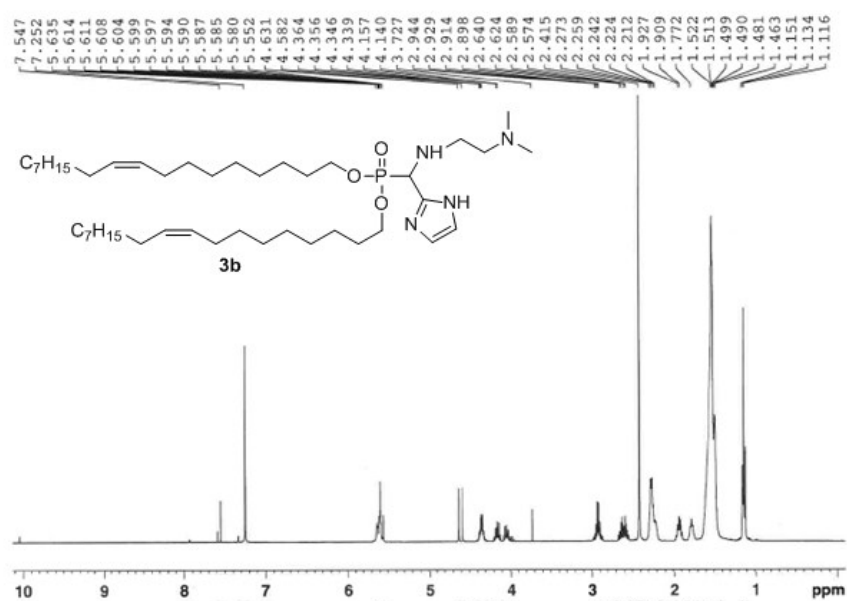

**$^{31}\text{P}$  NMR (162 MHz,  $\text{CDCl}_3$ ) of compound **3b**.**

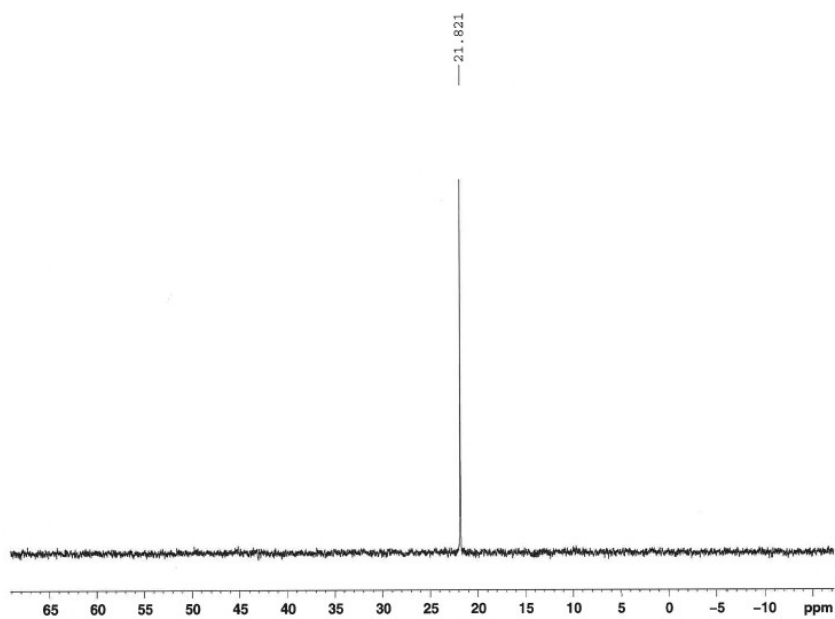

**<sup>13</sup>C NMR** (125 MHz, CDCl<sub>3</sub>) of compound **3b**.

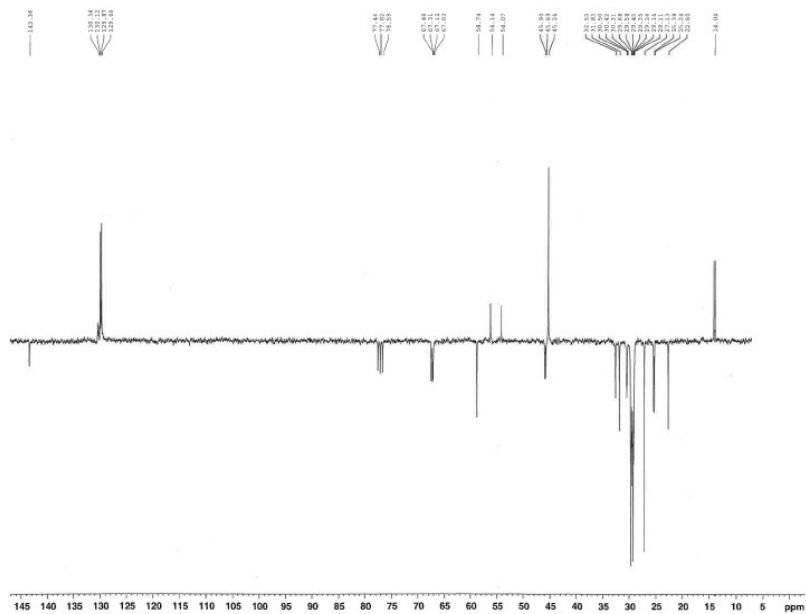

**<sup>1</sup>H NMR** (400 MHz, CDCl<sub>3</sub>) of compound **3d**.

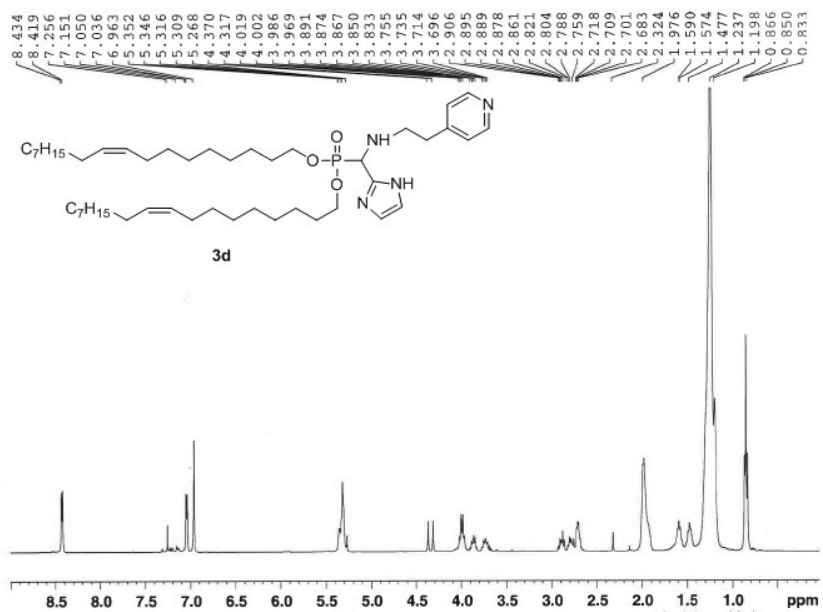

**$^{31}\text{P}$  NMR** (162 MHz,  $\text{CDCl}_3$ ) of compound **3d**.

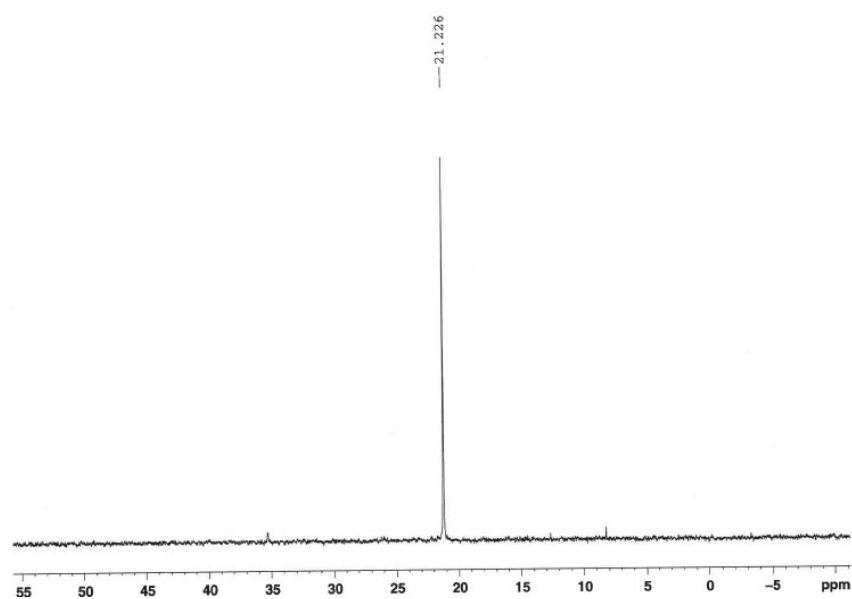

**$^{13}\text{C}$  NMR** (125 MHz,  $\text{CDCl}_3$ ) of compound **3d**.

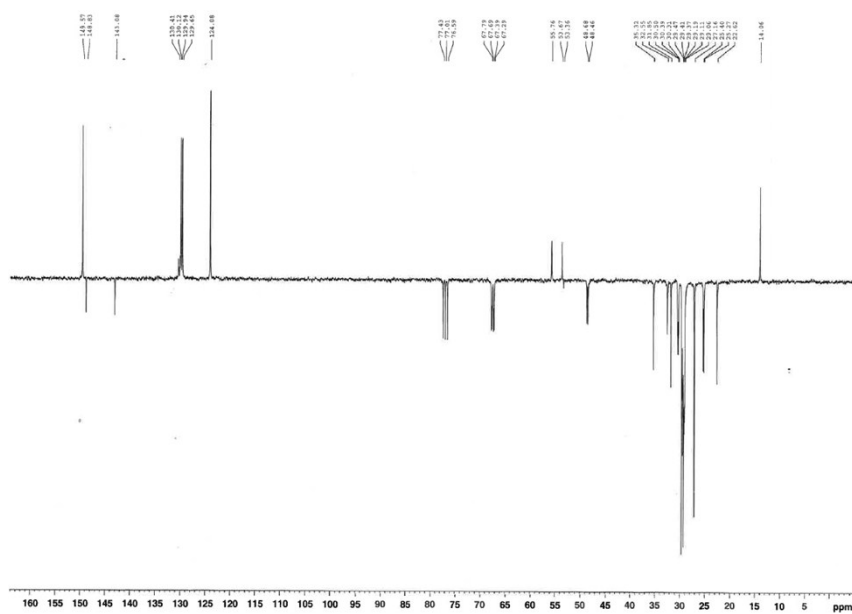

**$^1\text{H}$  NMR (400 MHz,  $\text{CDCl}_3$ ) of compound **3e**.**

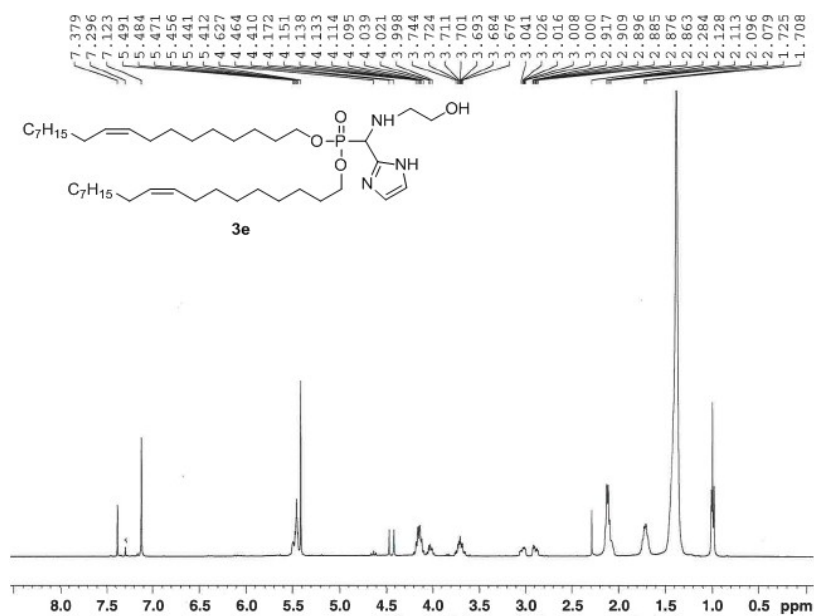

**$^{31}\text{P}$  NMR (162 MHz,  $\text{CDCl}_3$ ) of compound **3e**.**

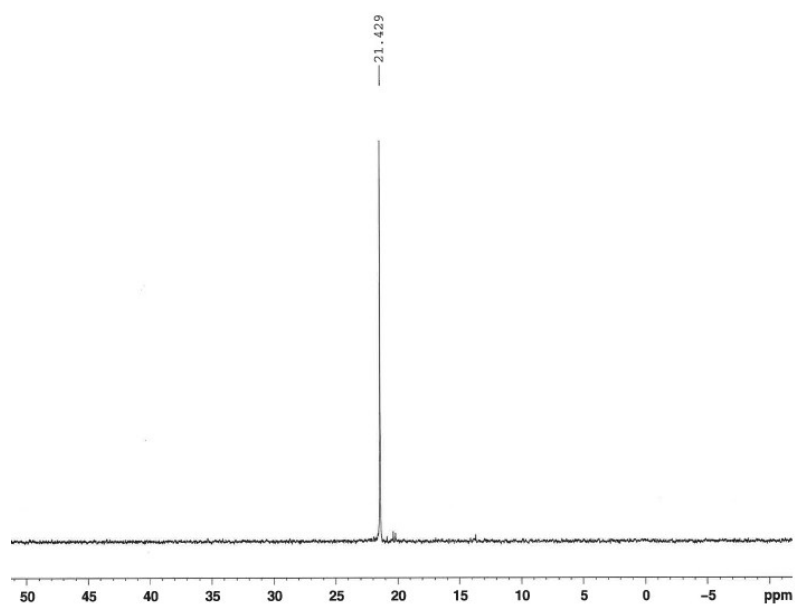

**$^{13}\text{C}$  NMR (125 MHz,  $\text{CDCl}_3$ ) of compound **3e**.**

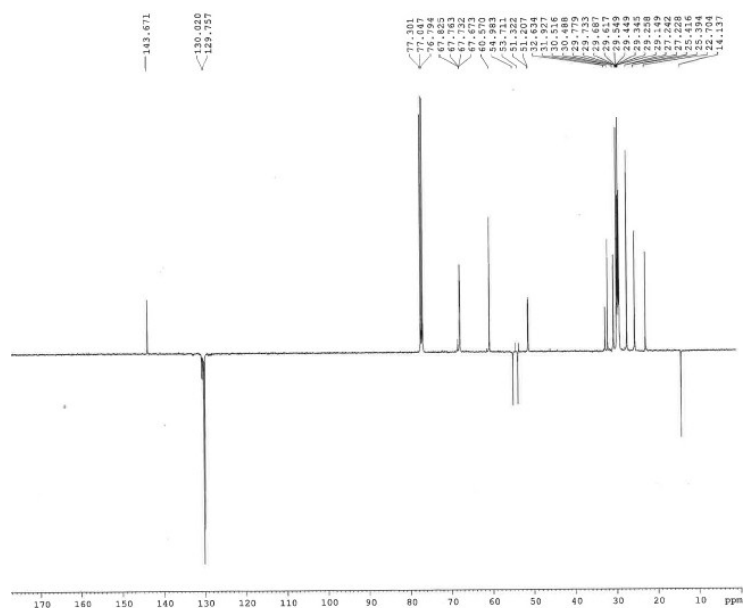

**$^1\text{H}$  NMR (400 MHz,  $\text{CDCl}_3$ ) of compound **4a**.**

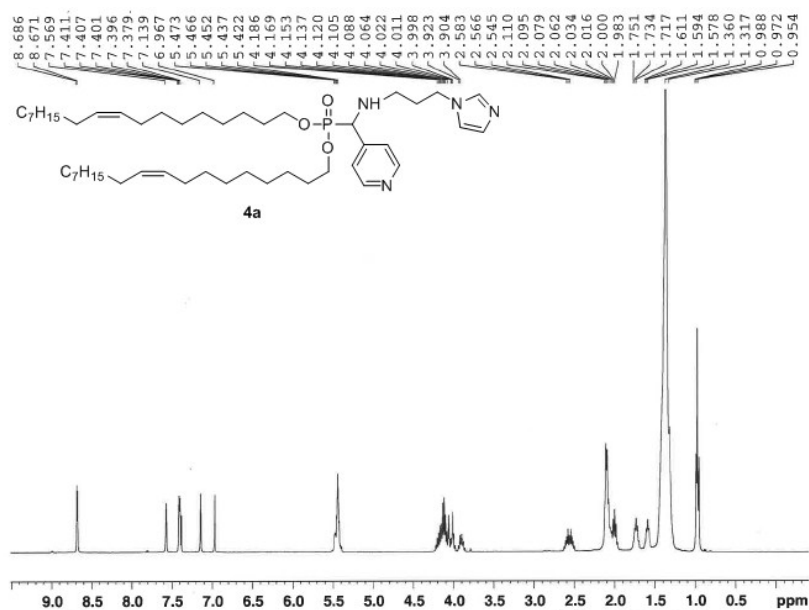

**$^{31}\text{P}$  NMR (162 MHz,  $\text{CDCl}_3$ ) of compound **4a**.**

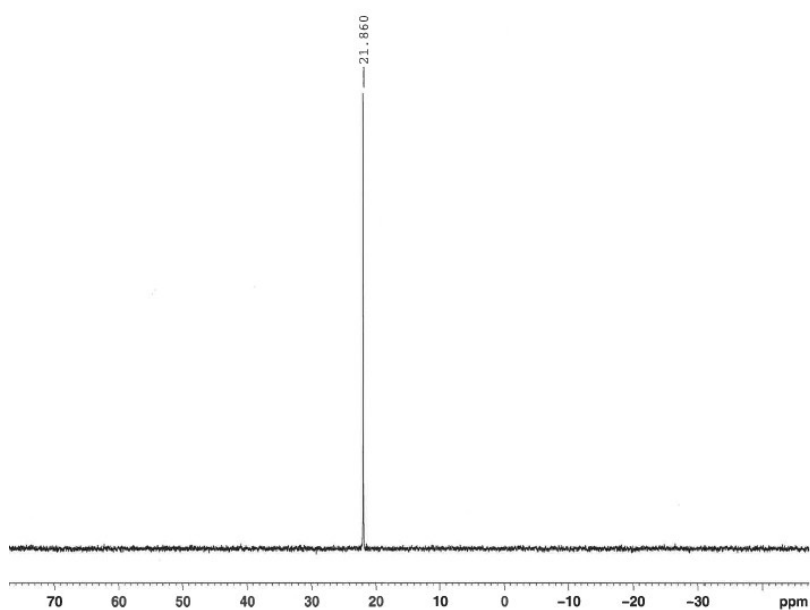

**$^{13}\text{C}$  NMR (125 MHz,  $\text{CDCl}_3$ ) of compound **4a**.**

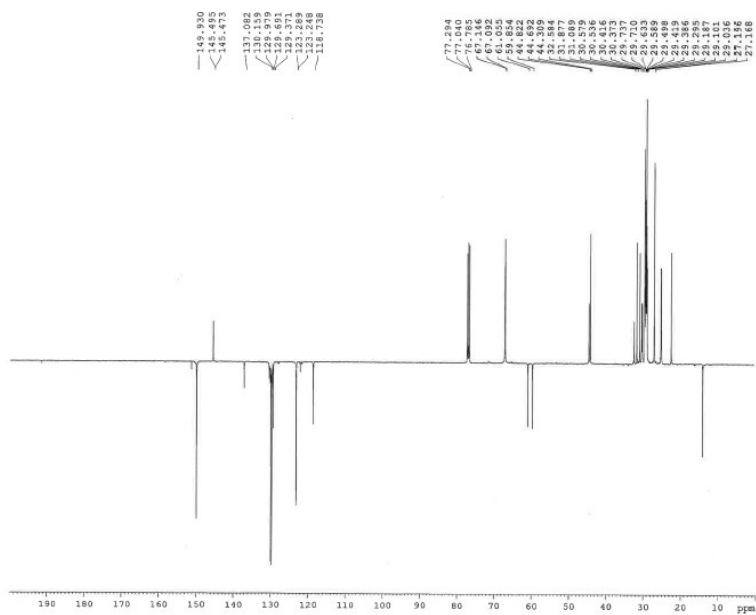

**$^1\text{H}$  NMR (400 MHz,  $\text{CDCl}_3$ ) of compound **4b**.**

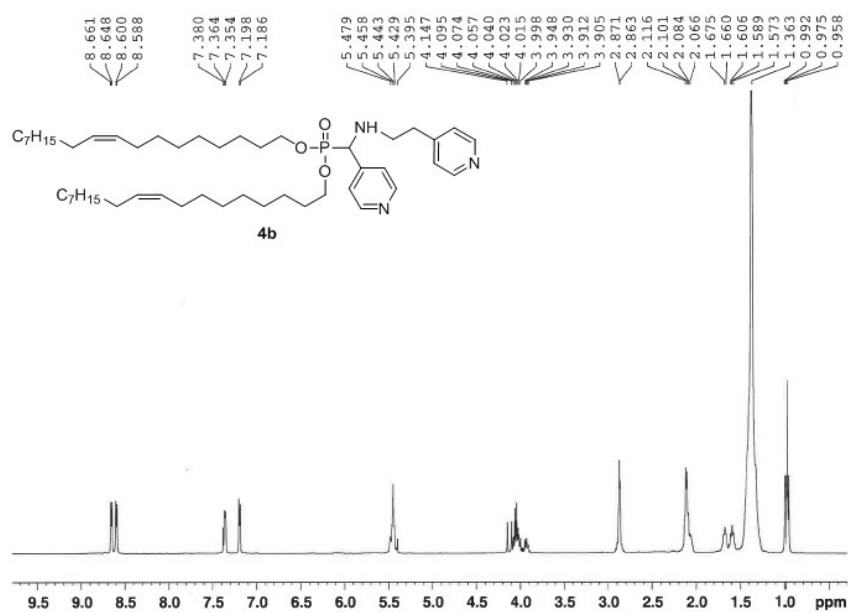

**$^{31}\text{P}$  NMR (162 MHz,  $\text{CDCl}_3$ ) of compound **4b**.**

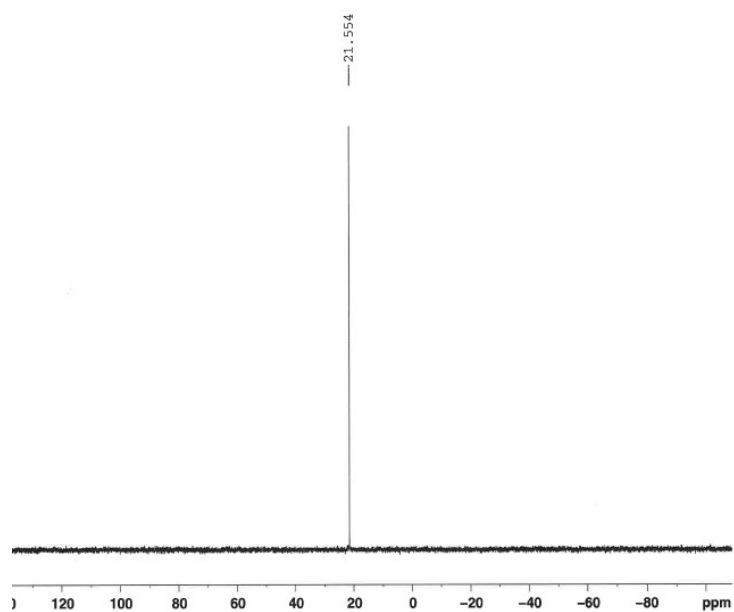



**$^{13}\text{C}$  NMR (125 MHz,  $\text{CDCl}_3$ ) of compound **4b**.**

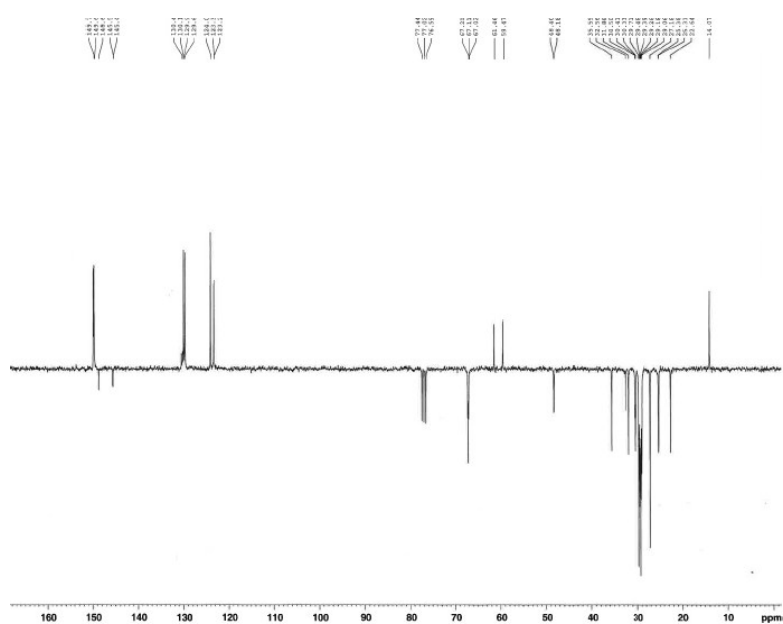

**$^1\text{H}$  NMR (400 MHz,  $\text{CDCl}_3$ ) of compound **5a**.**

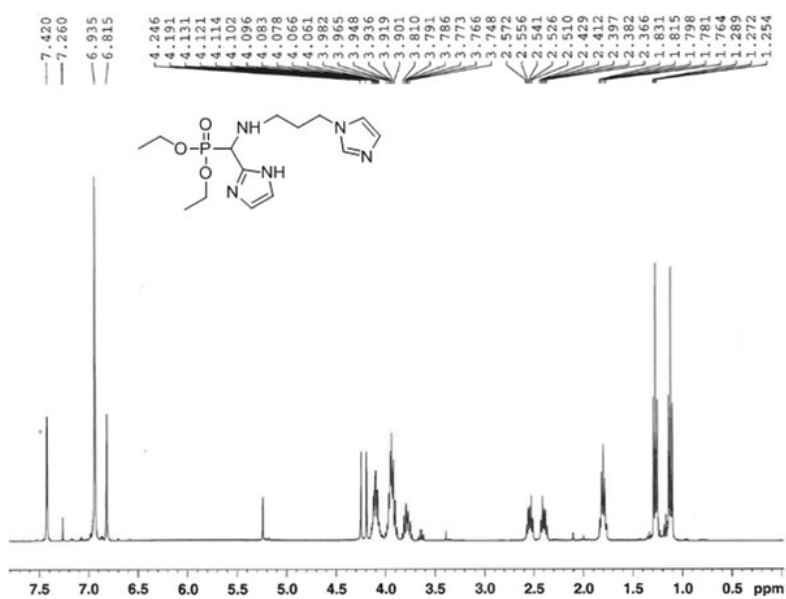

**$^{31}\text{P}$  NMR** (162 MHz,  $\text{CDCl}_3$ ) of compound **5a**.

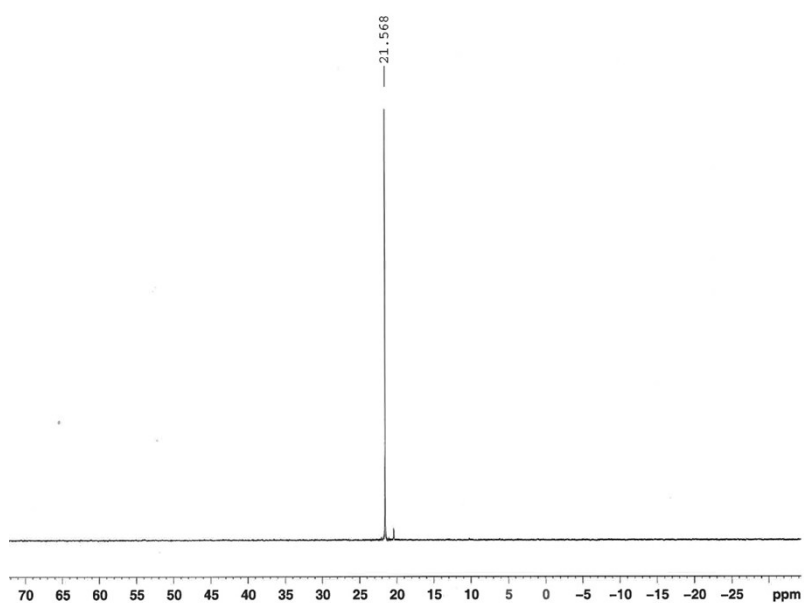

**$^{13}\text{C}$  NMR** (125 MHz,  $\text{CDCl}_3$ ) of compound **5a**.

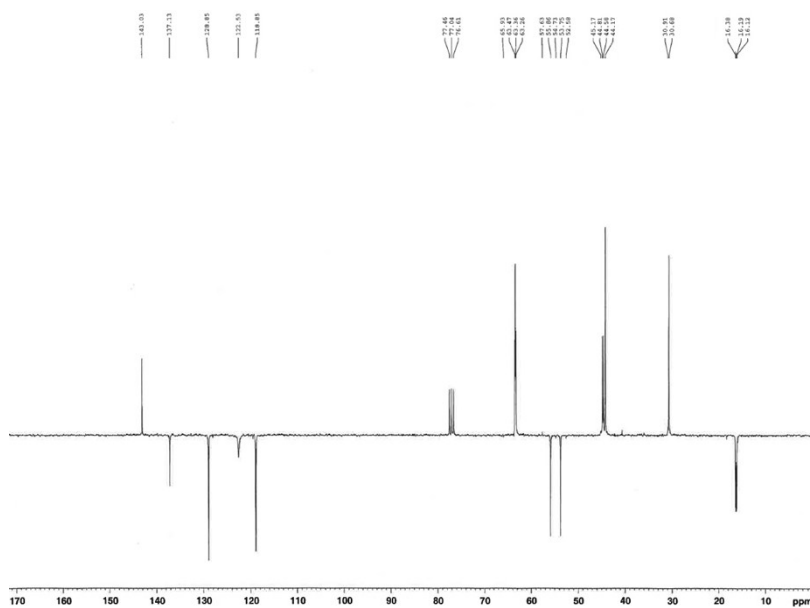

**$^1\text{H}$  NMR (400 MHz,  $\text{CDCl}_3$ ) of compound **5b**.**

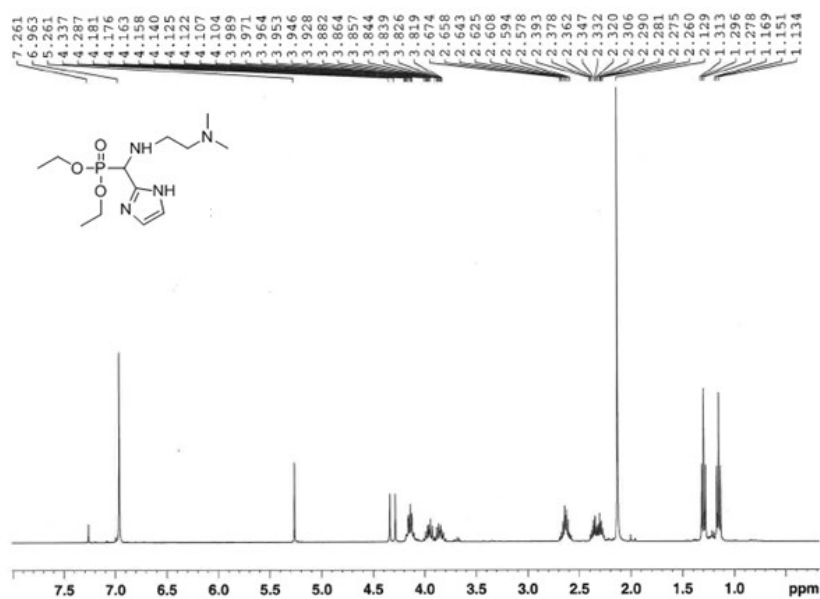

**$^{31}\text{P}$  NMR (162 MHz,  $\text{CDCl}_3$ ) of compound **5b**.**

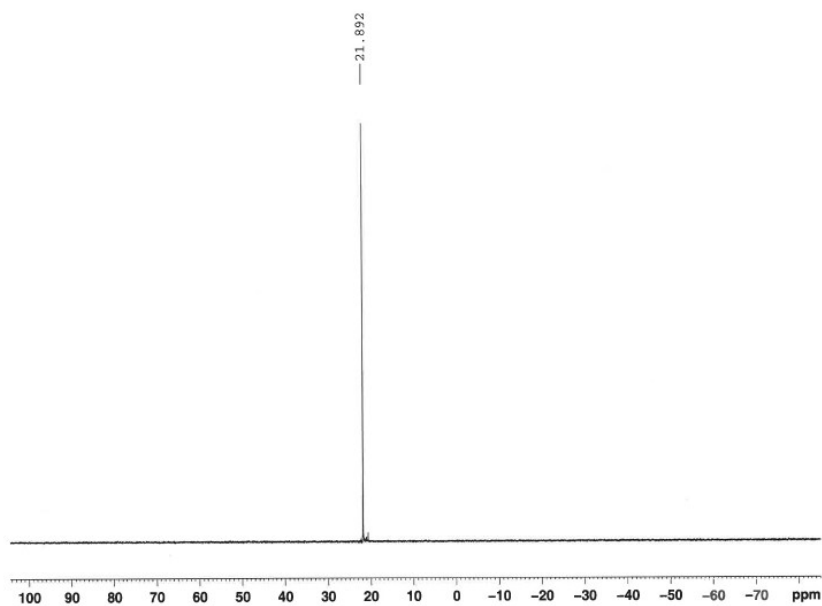

## SI; S-2: Evaluation of the stability of compounds 5a in acidic media

1- At room temperature at  $t_0$  (in acetate buffer, D<sub>2</sub>O as internal probe)

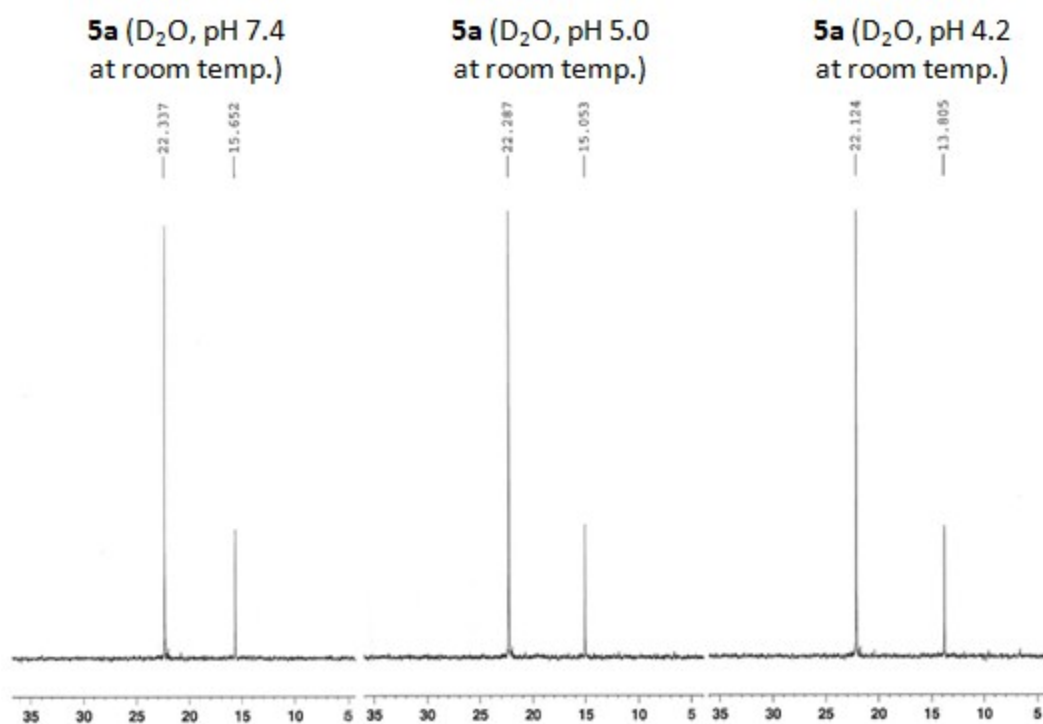

2- At room temperature after 5h at 37°C (in acetate buffer, D<sub>2</sub>O as internal probe)

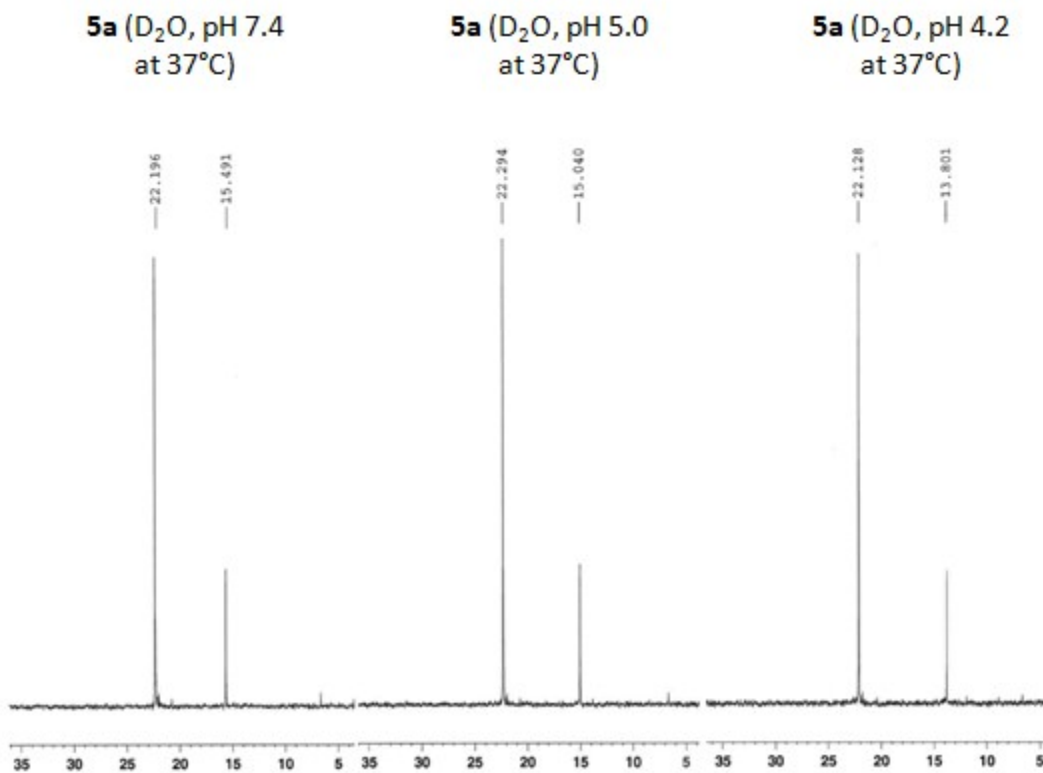

## SI; S-3: Evaluation of the stability of compounds **5b** in acidic media

1- At room temperature at  $t_0$  (in acetate buffer,  $D_2O$  as internal probe)

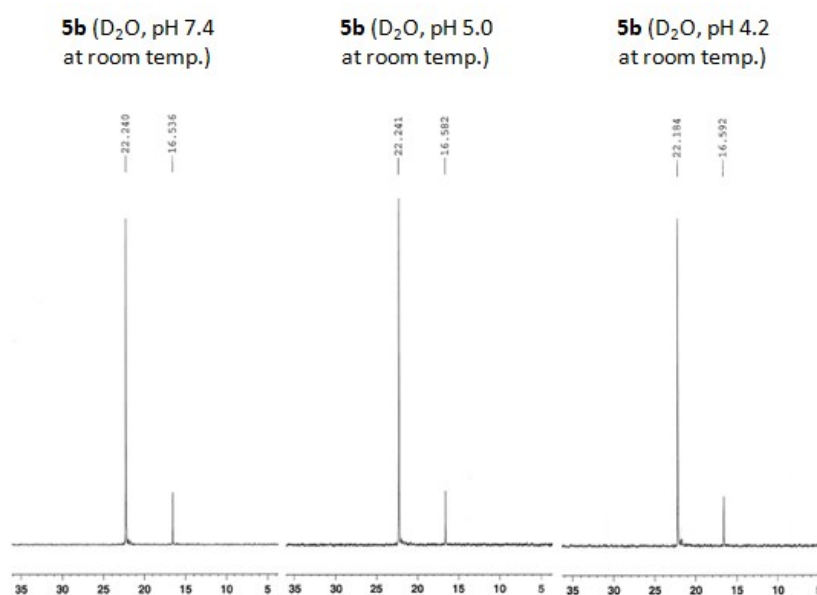

2- At room temperature after 5h at 37°C (in acetate buffer,  $D_2O$  as internal probe)

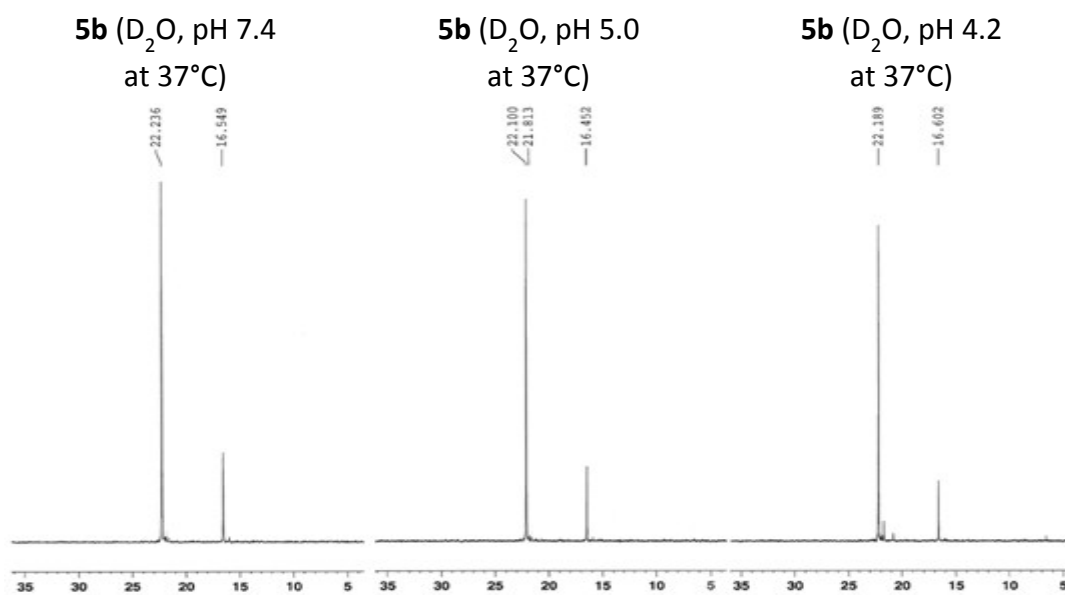

Supplement: c7tb01080j1.pdf [file c7tb01080j1.pdf]
